# Supplementary material
Source: PubMed Central journal article supplement (PMC3738246)
Supplement: jn.112.171355_nutrition171355SupplementaryData2.pdf [file jn.112.171355_nutrition171355SupplementaryData2.pdf]

# Online Supporting Material

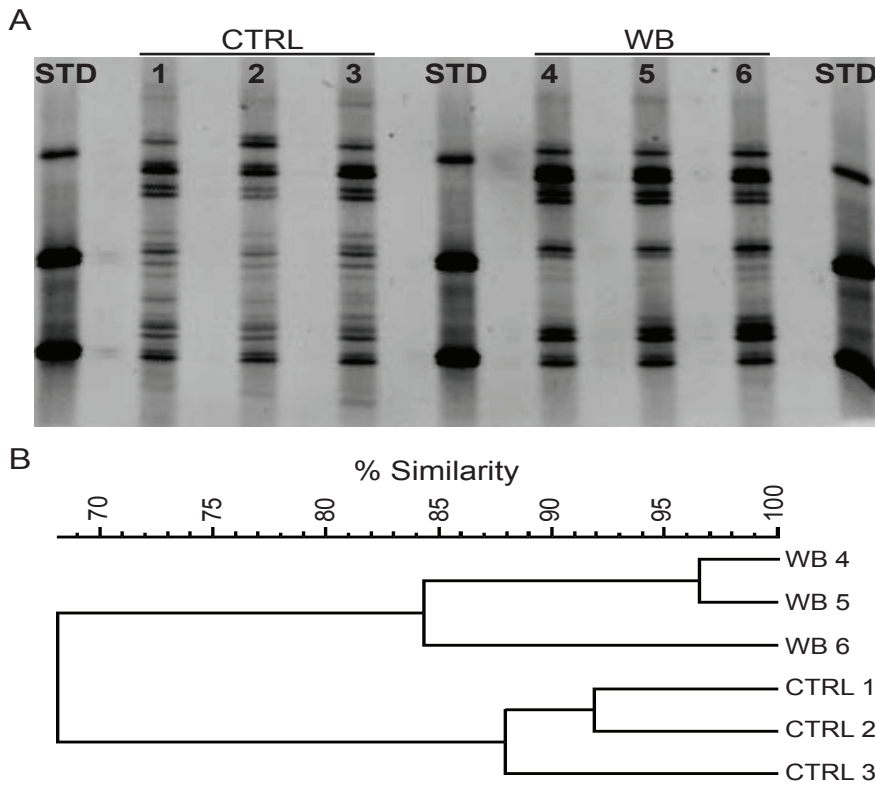

Supplemental Figure 2. Fecal DNA from mice fed WB and CTRL diets and infected with *C. rodentium* for 14 d were analysed by A) DGGE and then the banding profiles were B) clustered to show the similarity of the bands from each sample to the other samples. CTRL: control, STD: standard, WB: white button.
