# Supplementary material
Source: PubMed Central journal article supplement (PMC3738246)

## Online Supporting Material

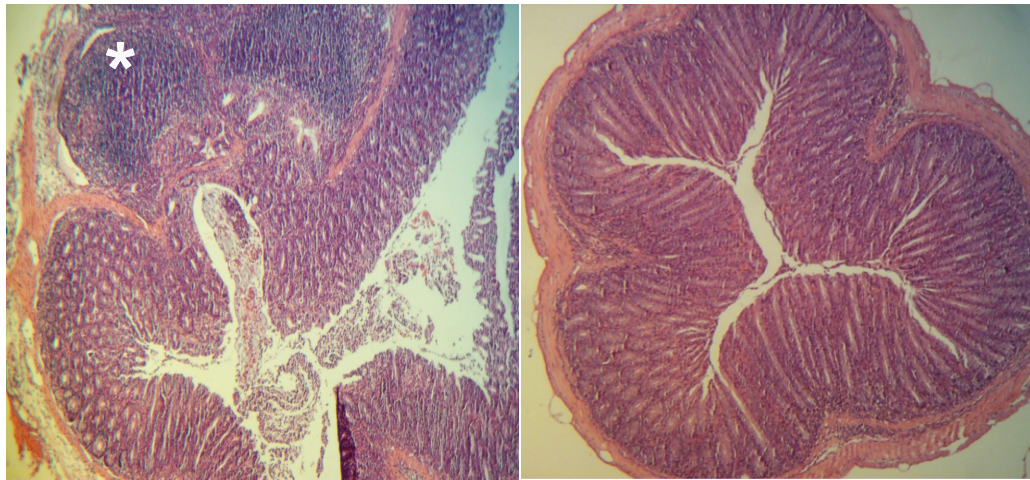

**CTRL**

**WB**

Supplemental Figure 1: Color reproduction of Figure 5B.

Supplement: jn.112.171355_nutrition171355SupplementaryData1.pdf [file jn.112.171355_nutrition171355SupplementaryData1.pdf]
